# Supplementary material
Source: PubMed Central journal article supplement (PMC3099127)
Supplement: NIHMS287048-supplement-3.pdf [file NIHMS287048-supplement-3.pdf]

**A**

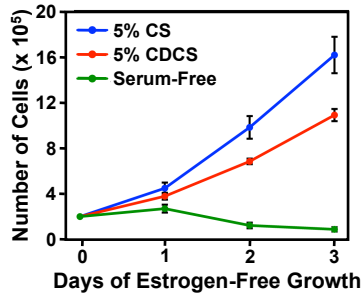

**B**

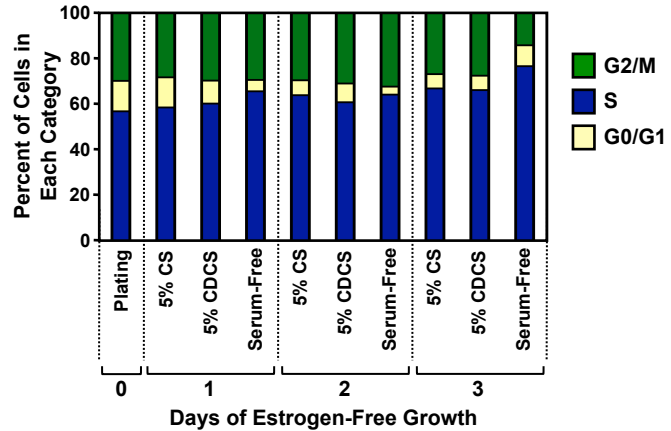

**C**

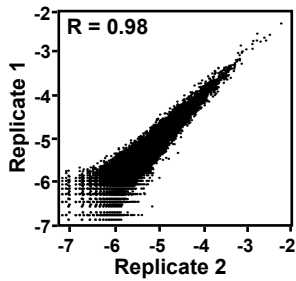

| E2 (min.) | Corr. Coeff. (R) |
|-----------|------------------|
| 0         | 0.9627153        |
| 10        | 0.9744017        |
| 40        | 0.9824462        |
| 160       | 0.9788250        |

**D**

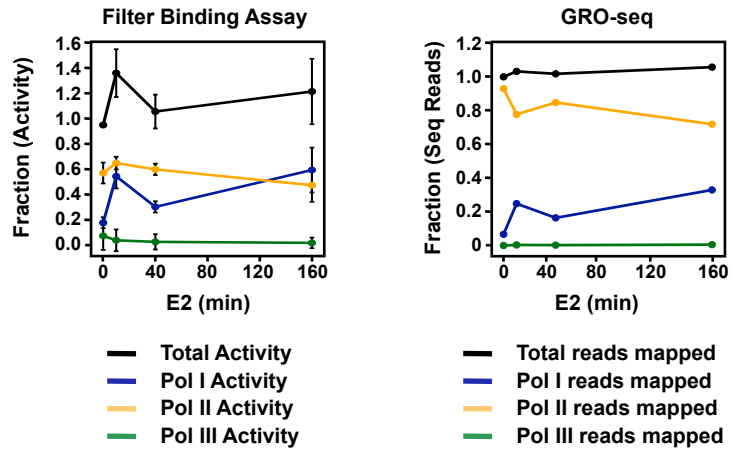

**E**

Comparing Transcripts with Annotations

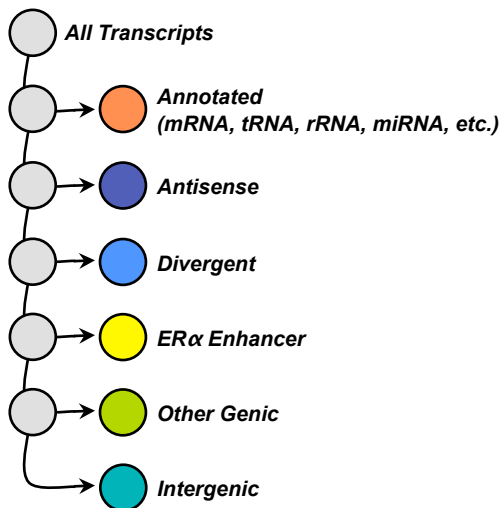

**F**

- Annotated (Genic):** Transcripts with significant overlap to existing annotations.
  - Antisense:** Transcripts that run antisense to and overlap with annotated transcripts.
  - Divergent:** Transcripts that run antisense to and overlap with the 5' promoter of any detected transcript.
  - ER $\alpha$  Enhancer:** Transcripts that originate near an ER $\alpha$  binding site that is far from known promoters.
  - Other Genic (Poorly Matching Annotated):** Transcripts that overlap a segment of an annotated protein coding gene on either strand, but area poor match to the annotation.
- Intergenic:** Transcripts that do not fit into the categories noted above.
