# Supplementary material
Source: PubMed Central journal article supplement (PMC3099127)
Supplement: NIHMS287048-supplement-4.pdf [file NIHMS287048-supplement-4.pdf]

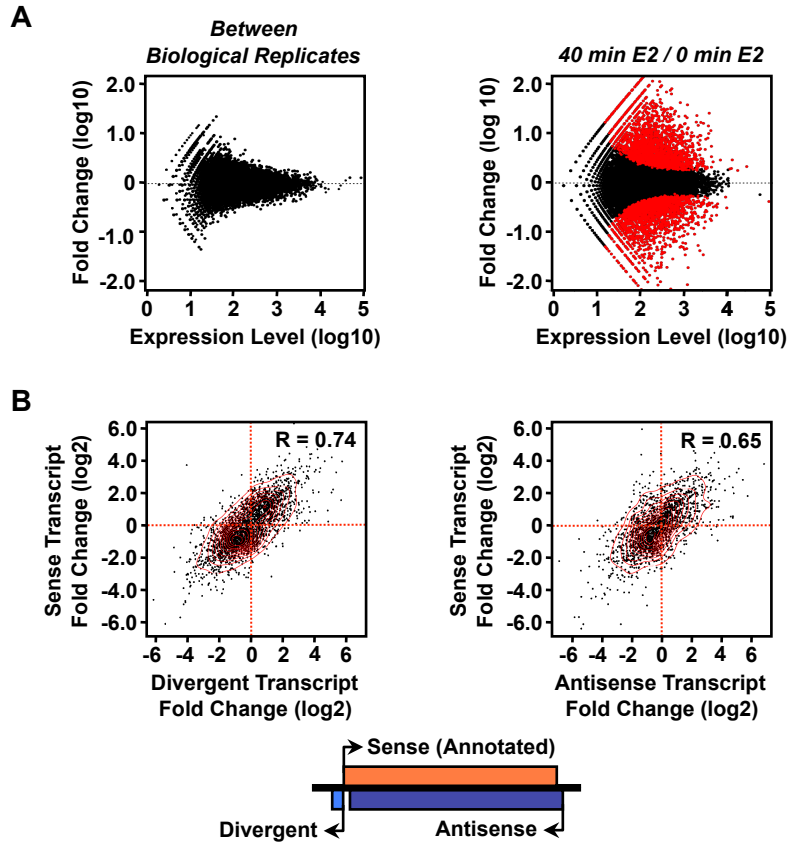

**C**

| <u>Transcript Type</u> | Percent of E2-Regulated Transcripts Associated With: |                  |
|------------------------|------------------------------------------------------|------------------|
|                        | <u>Divergent</u>                                     | <u>Antisense</u> |
| • All Transcripts:     |                                                      |                  |
| - Down-regulated       | 13.8                                                 | 11.5             |
| - Peak at 40 min.      | 12.9                                                 | 7.5              |
| - Peak at 40 min.      | 14.7                                                 | 6.4              |
| - Peak at 160 min.     | 16.7                                                 | 6.9              |
| • Annotated            | 30.5                                                 | 10.4             |
