# Supplementary material
Source: PubMed Central journal article supplement (PMC3099127)

**A** Transcription of the pri-miRNA is down-regulated by E2

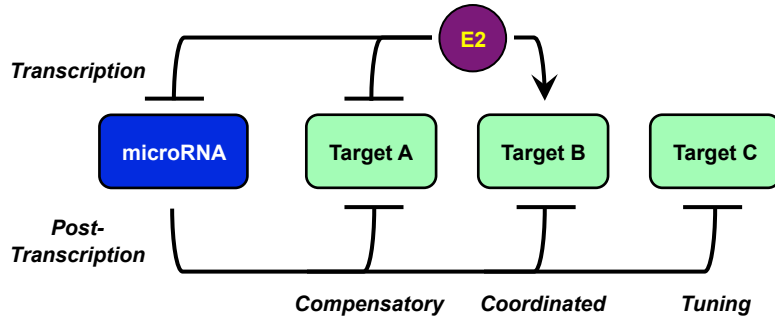

**B** Transcription of the pri-miRNA is up-regulated by E2

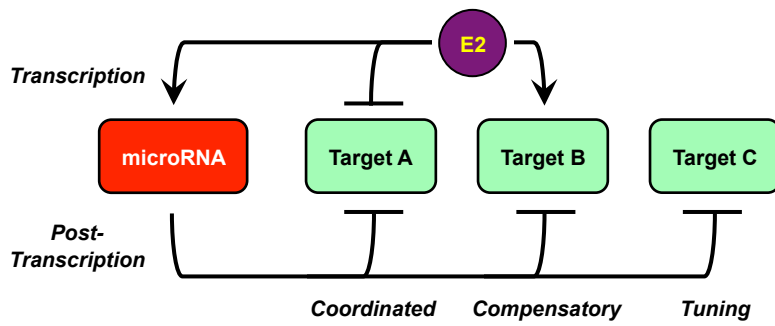

Supplement: NIHMS287048-supplement-7.pdf [file NIHMS287048-supplement-7.pdf]
