# Supplementary material
Source: PubMed Central journal article supplement (PMC3099127)
Supplement: NIHMS287048-supplement-8.pdf [file NIHMS287048-supplement-8.pdf]

**A**

|                |   | Second Position |     |     |     |     |      |     |      |   |
|----------------|---|-----------------|-----|-----|-----|-----|------|-----|------|---|
|                |   | U               |     | C   |     | A   |      | G   |      |   |
| First Position | U | UUU             | Phe | UCU | Ser | UAU | Tyr  | UGU | Cys  | U |
|                |   | UUC             |     | UCC |     | UAC |      | UGC |      | C |
|                |   | UUA             | Leu | UCA |     | UAA | STOP | UGA | STOP | A |
|                |   | UUG             |     | UCG |     | UAG | STOP | UGG | Trp  | G |
|                | C | CUU             | Leu | CCU | Pro | CAU | His  | CGU | Arg  | U |
|                |   | CUC             |     | CCC |     | CAC |      | CGC |      | C |
|                |   | CUA             |     | CCA |     | CAA | Gln  | CGA |      | A |
|                |   | CUG             |     | CCG |     | CAG |      | CGG |      | G |
|                | A | AUU             | Ile | ACU | Thr | AAU | Asn  | AGU | Ser  | U |
|                |   | AUC             |     | ACC |     | AAC |      | AGC |      | C |
|                |   | AUA             |     | ACA |     | AAA | Lys  | AGA | Arg  | A |
|                |   | AUG             |     | ACG |     | AAG |      | AGG |      | G |
|                | G | GUU             | Val | GCU | Ala | GAU | Asp  | GGU | Gly  | U |
|                |   | GUC             |     | GCC |     | GAC |      | GGC |      | C |
|                |   | GUA             |     | GCA |     | GAA | Glu  | GGA |      | A |
|                |   | GUG             |     | GCG |     | GAG |      | GGG |      | G |

Annotated in hg18  
 Not annotated in hg18  
 E2-Regulated

**B**

Protein coding genes with a primary biological function associated with protein translation, or otherwise associated with the ribosome

GO:0005840 Ribosome cellular compartement  
 GO:0042254 Ribosome biogenesis  
 GO:0016072 rRNA metabolic process  
 GO:000636: rRNA processing  
 GO:0043039: tRNA aminoacylation  
 GO:0008033: tRNA processing
