# Supplementary material
Source: PubMed Central journal article supplement (PMC3099127)

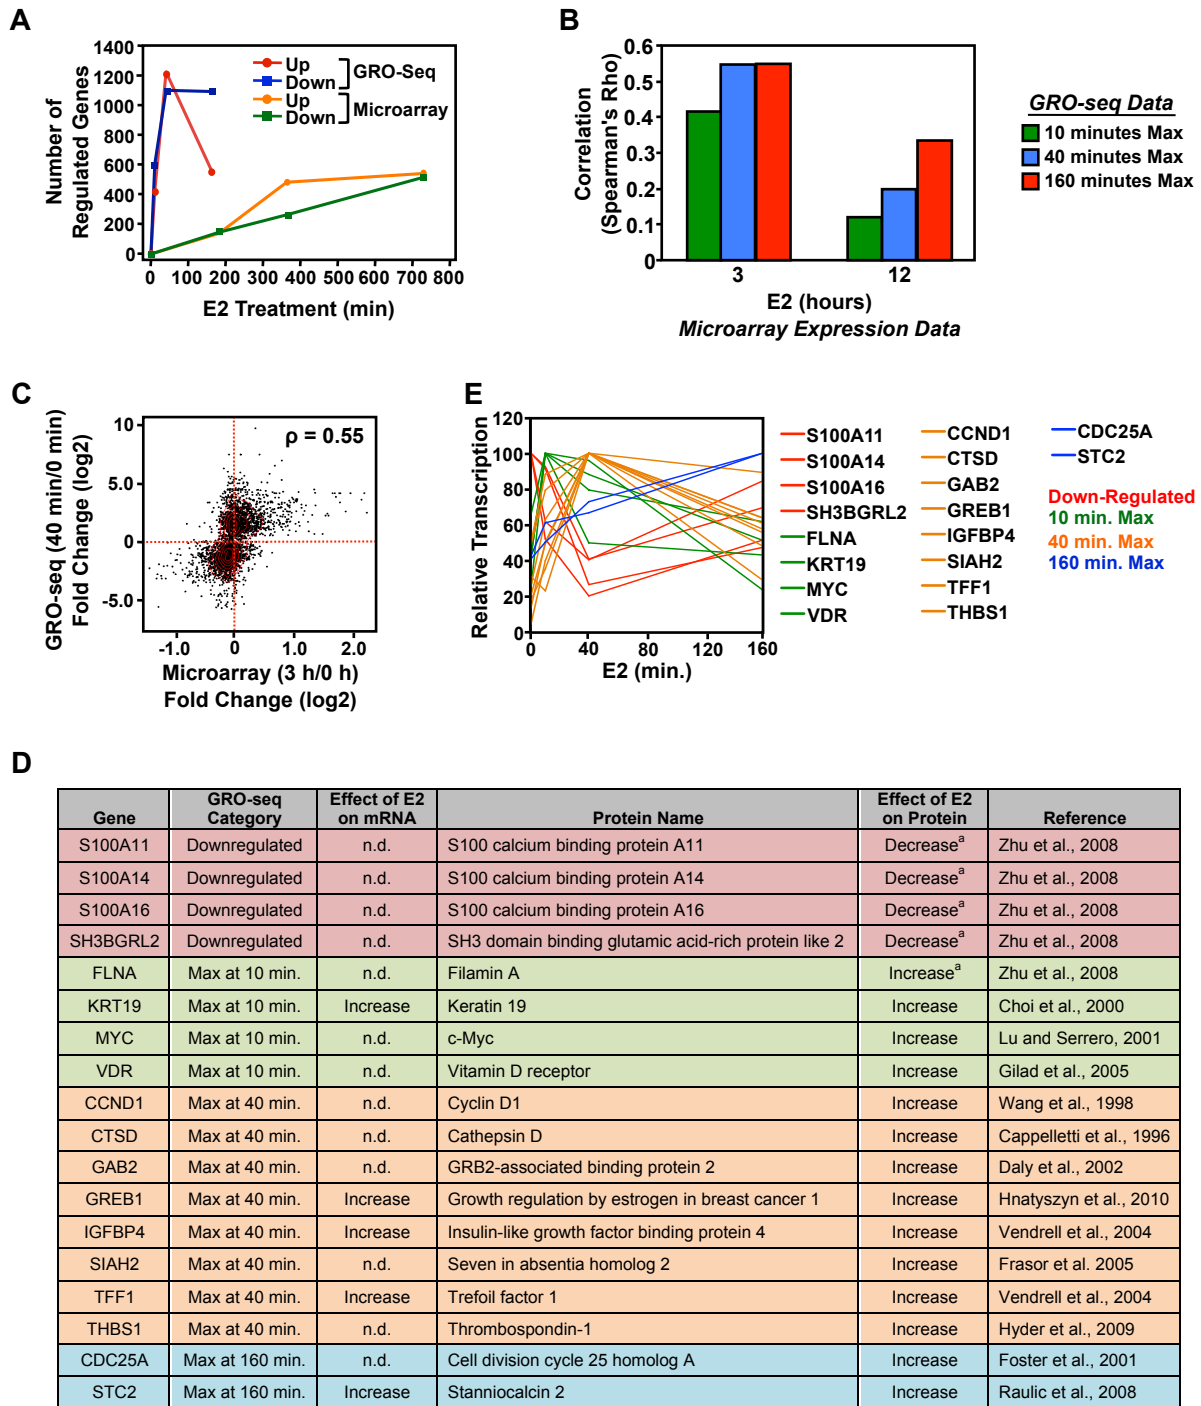

Supplement: NIHMS287048-supplement-5.pdf [file NIHMS287048-supplement-5.pdf]

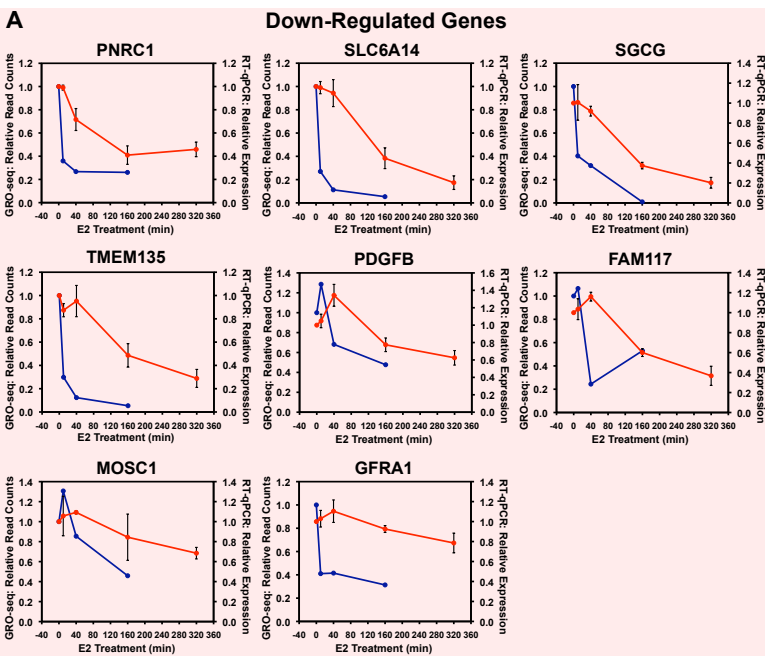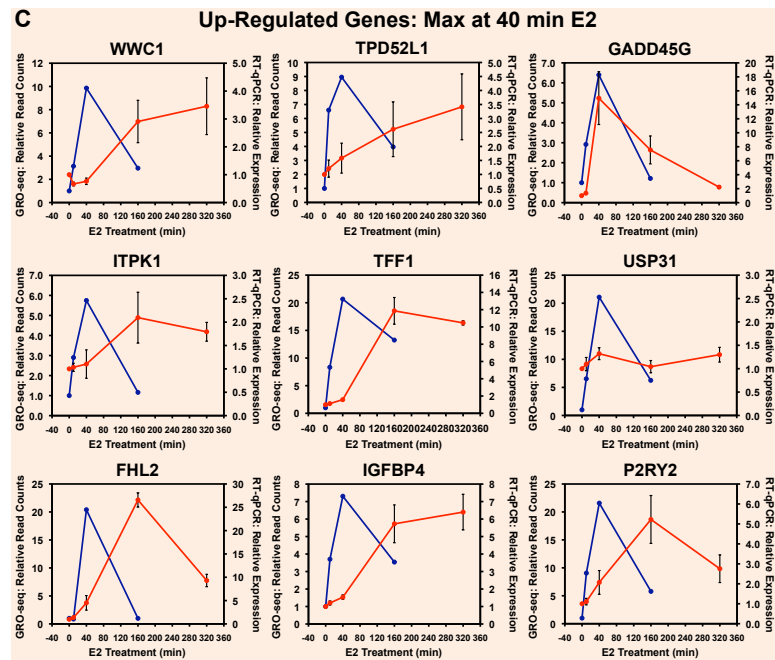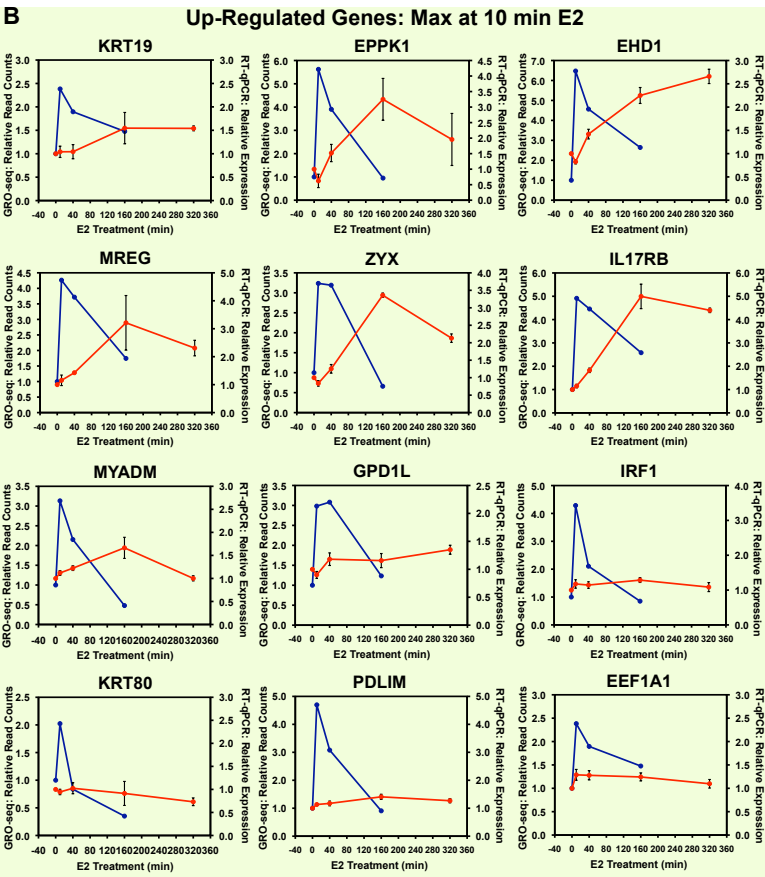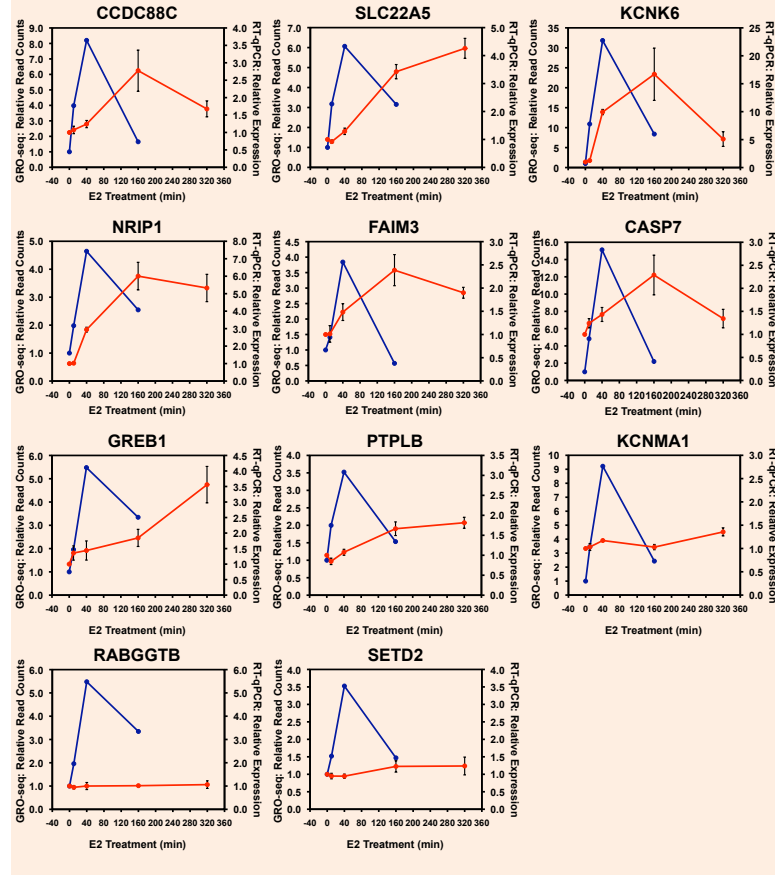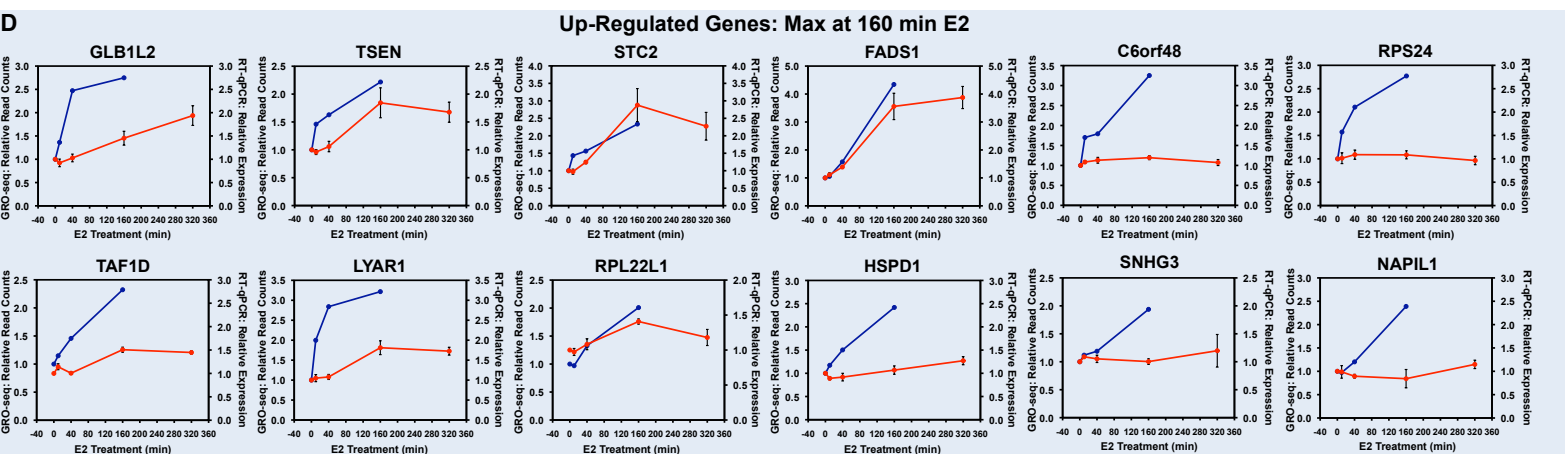

Supplement: NIHMS287048-supplement-6.pdf [file NIHMS287048-supplement-6.pdf]
